# Supplementary material for: The control of tonic pain by active relief learning
Source: eLife journal article supplement (doi:10.7554/elife.31949), 2018-02-26
Supplement: supp [file elife-31949-supp-v1.zip]

Archive with 11 entries (11 files):
- elife_poa_e31949_Figure_2_figure_supplement_2.pdf
- elife_poa_e31949_Figure_5_figure_supplement_1.pdf
- elife_poa_e31949_Transparent_Reporting_File.pdf
- elife_poa_e31949_Figure_4_figure_supplement_3.pdf
- elife_poa_e31949_Figure_2_source_data_1.zip
- elife_poa_e31949_Figure_2_figure_supplement_3.pdf
- elife_poa_e31949_Figure_4_figure_supplement_1.pdf
- elife_poa_e31949_Figure_2_figure_supplement_1.pdf
- elife_poa_e31949_Figure_4_source_data_1.zip
- elife_poa_e31949_Figure_4_figure_supplement_2.pdf
- elife_poa_e31949_Figure_5_figure_supplement_2.pdf
