# Supplementary figures and images for: The control of tonic pain by active relief learning
Source: eLife journal article supplement (doi:10.7554/elife.31949), 2018-02-26

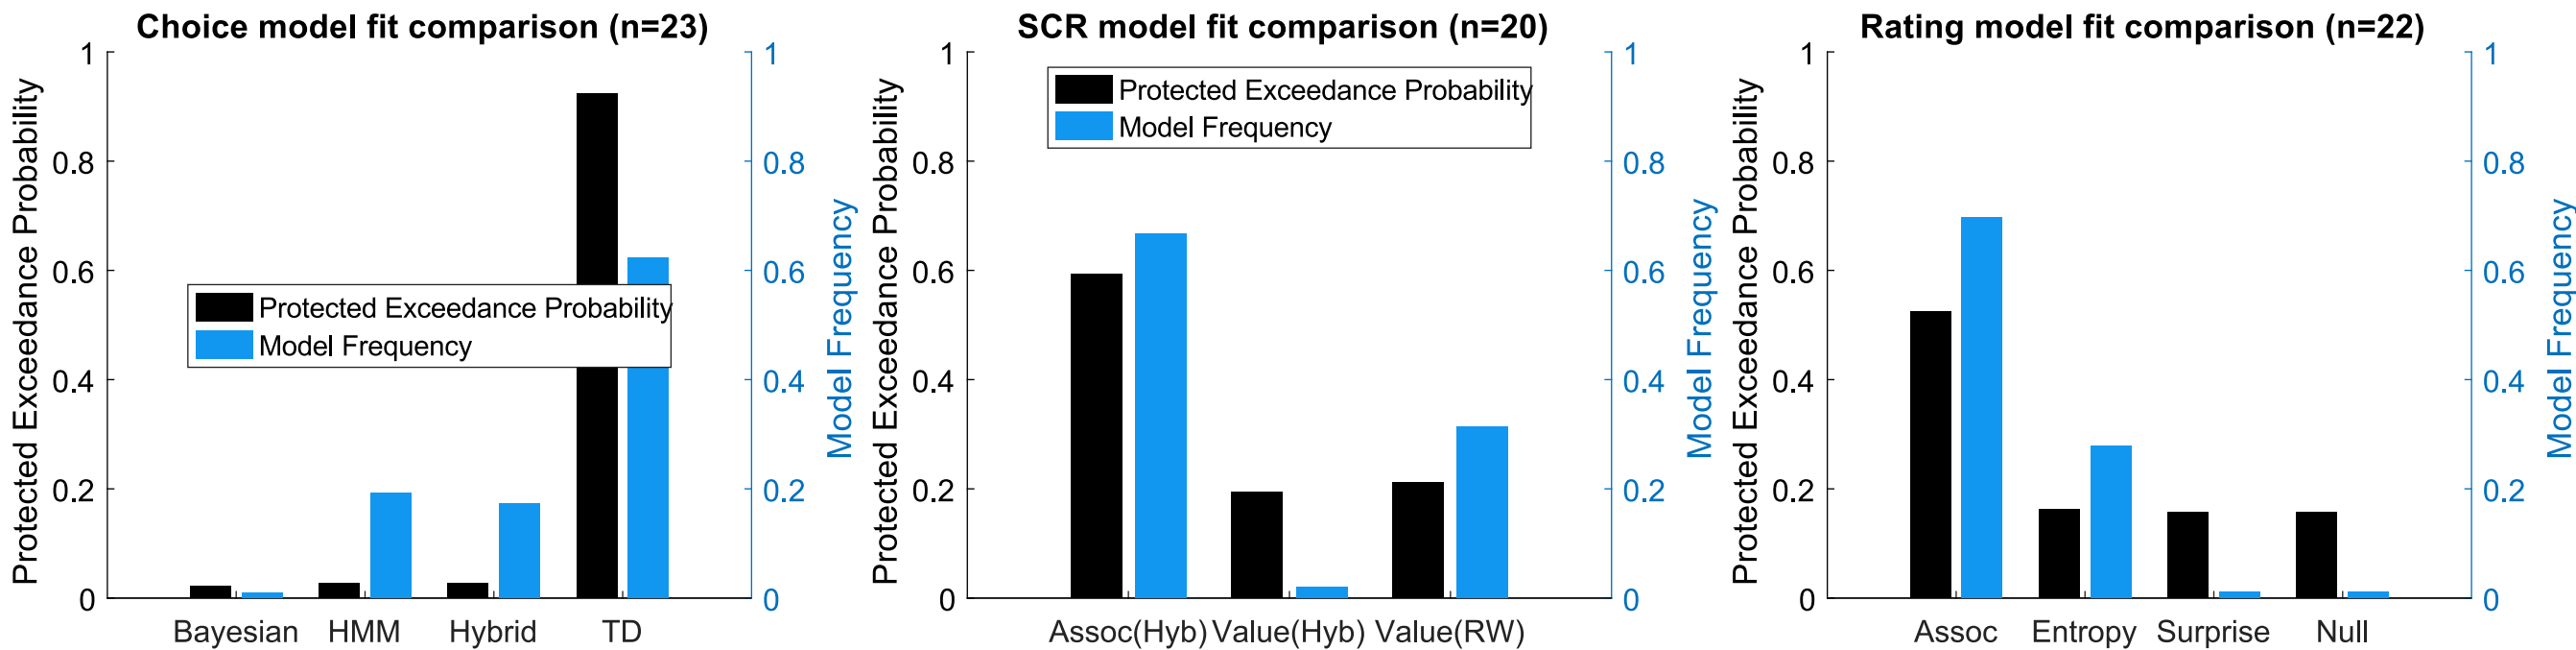

Supplement: supp [file elife-31949-supp-v1.zip]

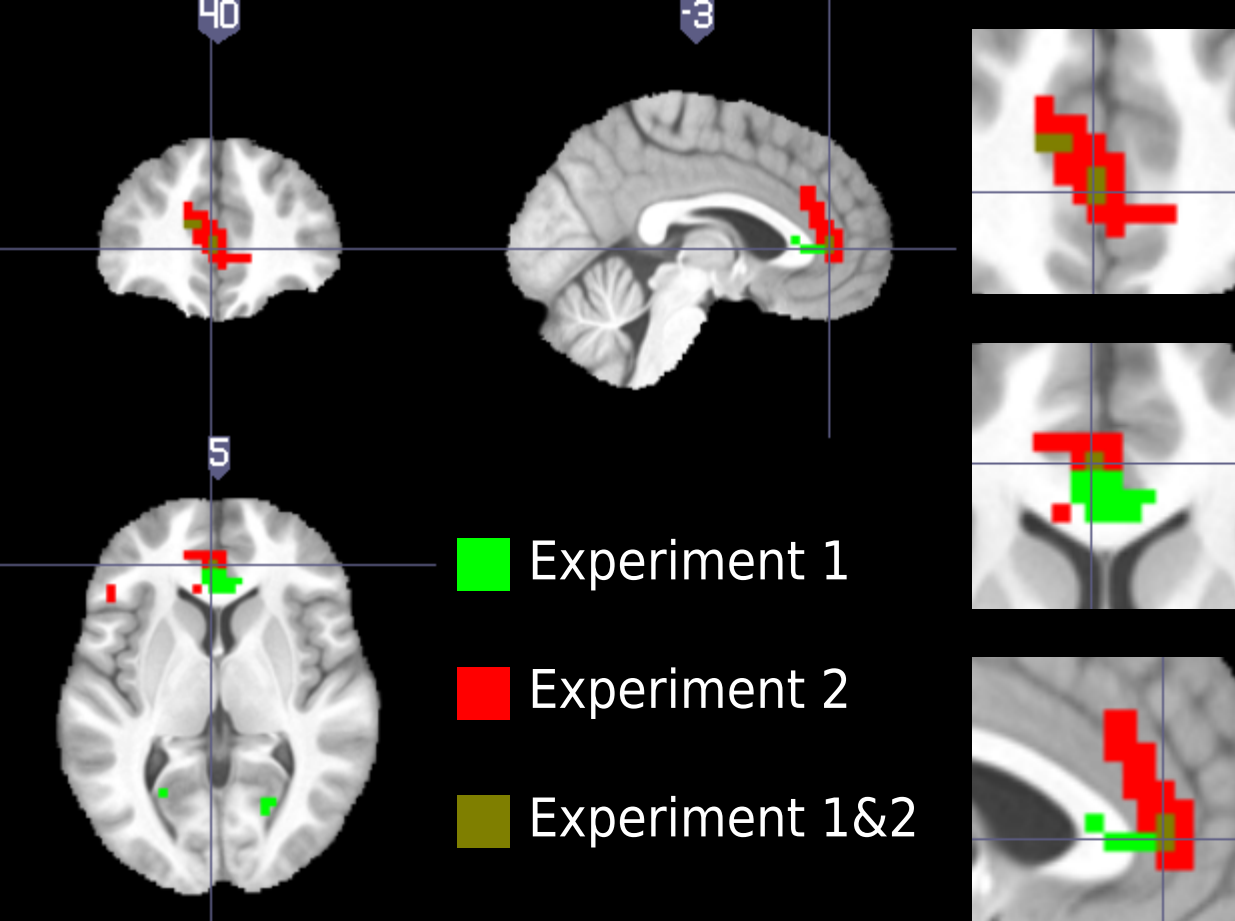

Supplement: supp [file elife-31949-supp-v1.zip]

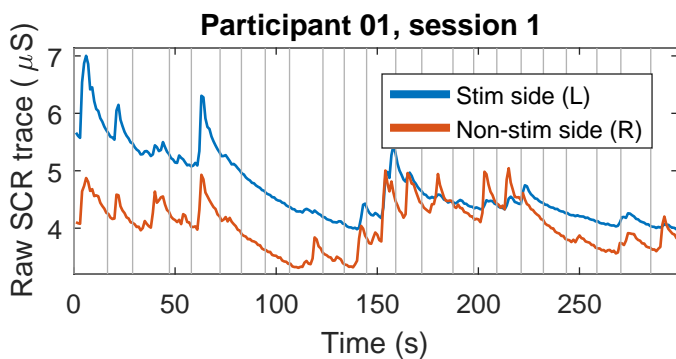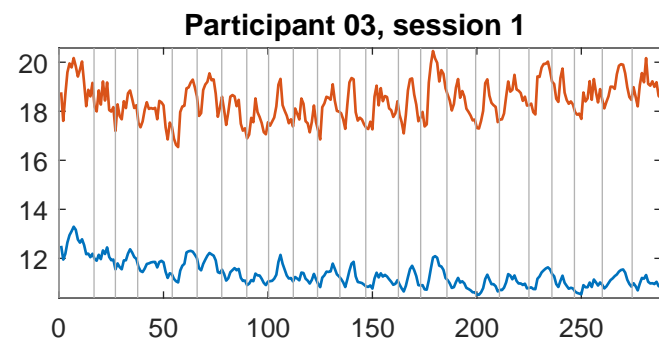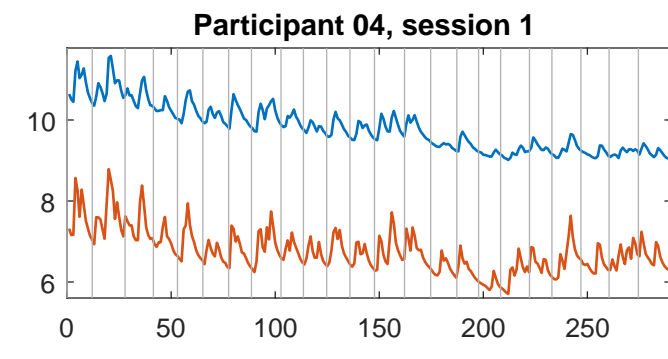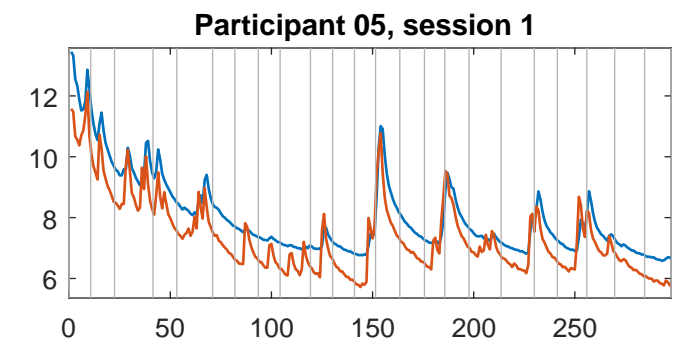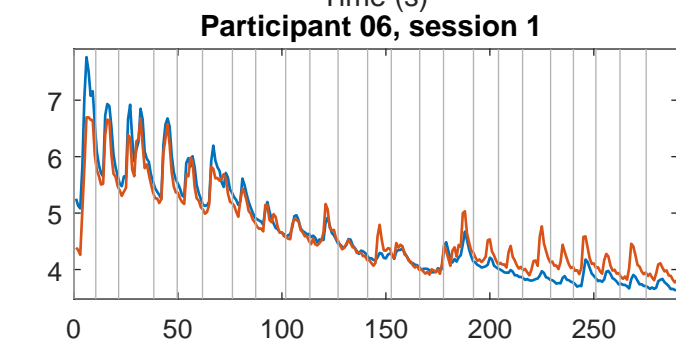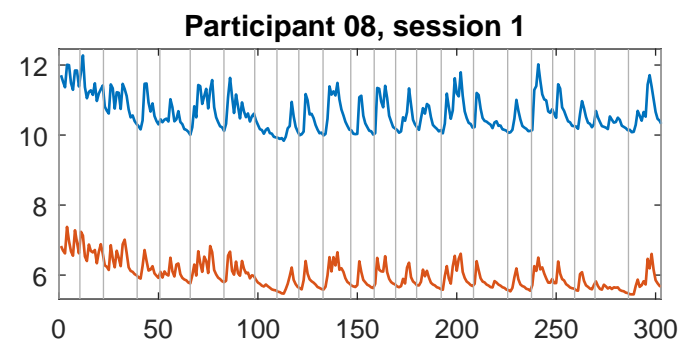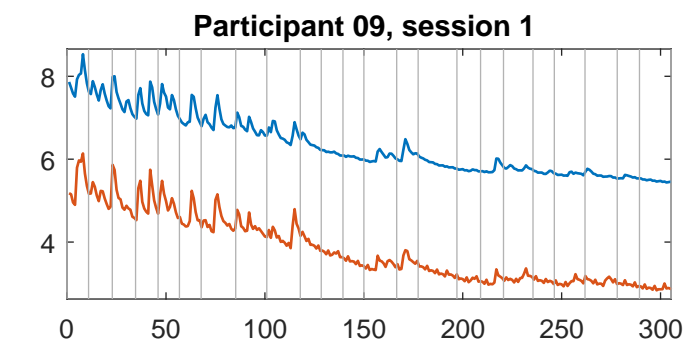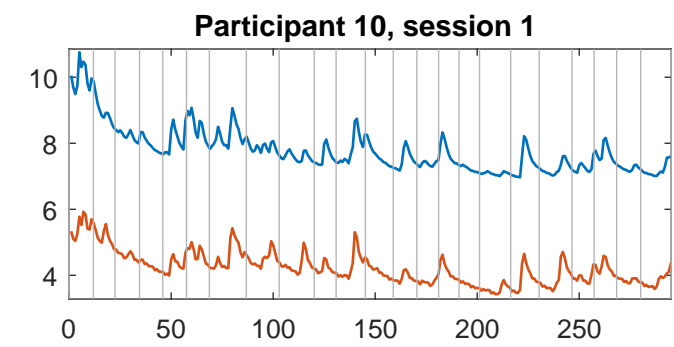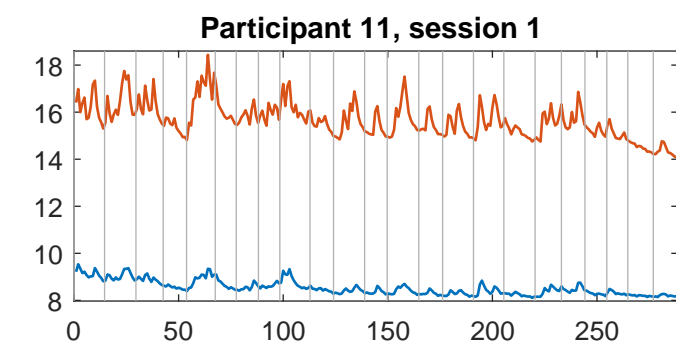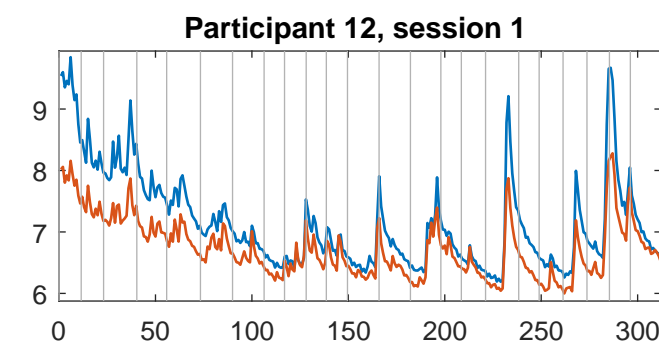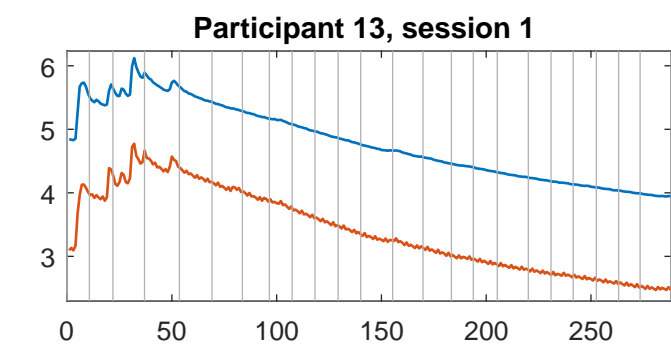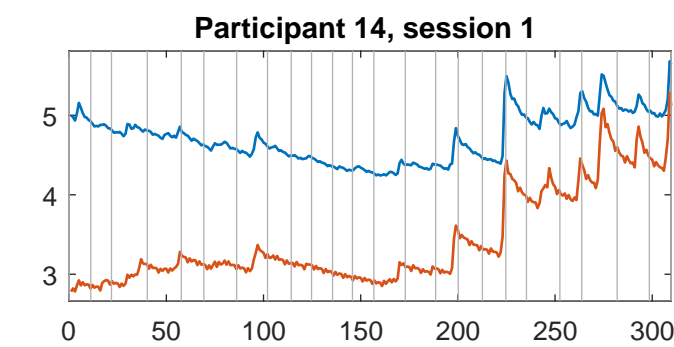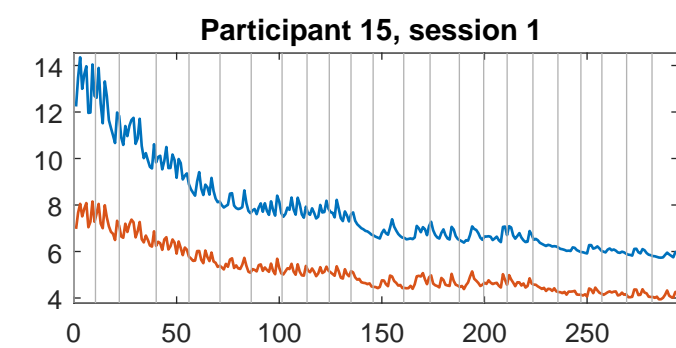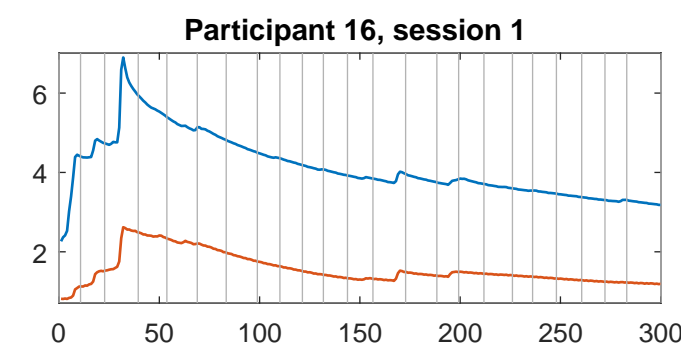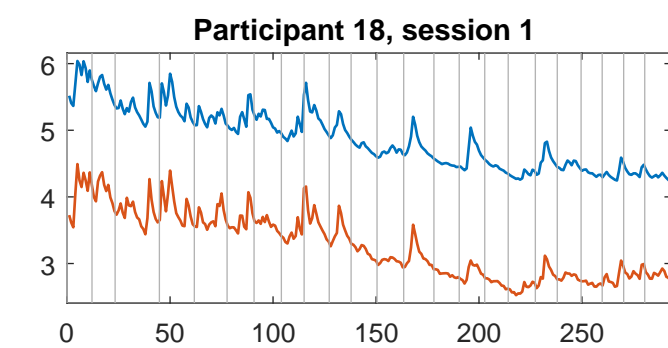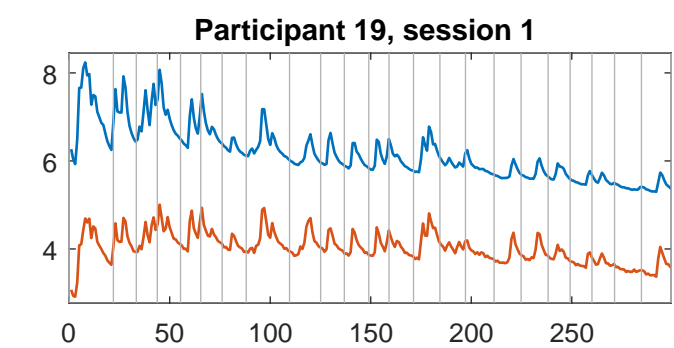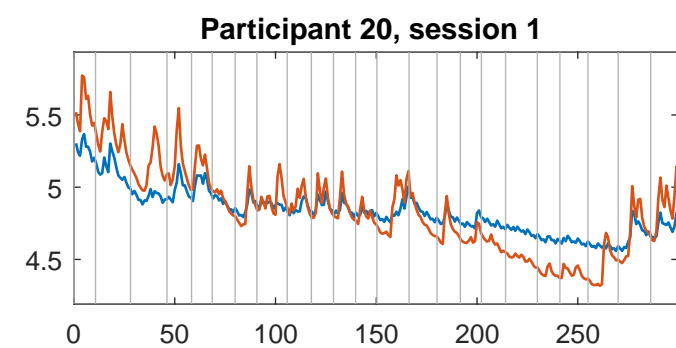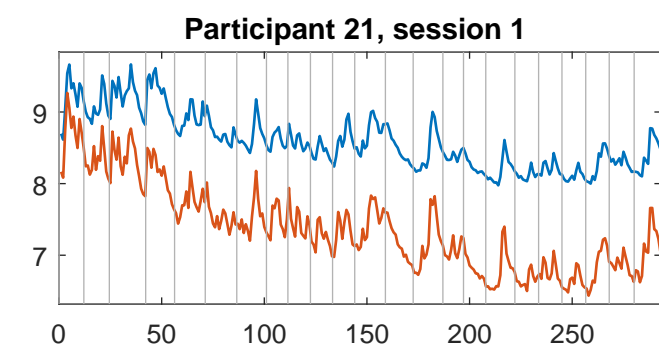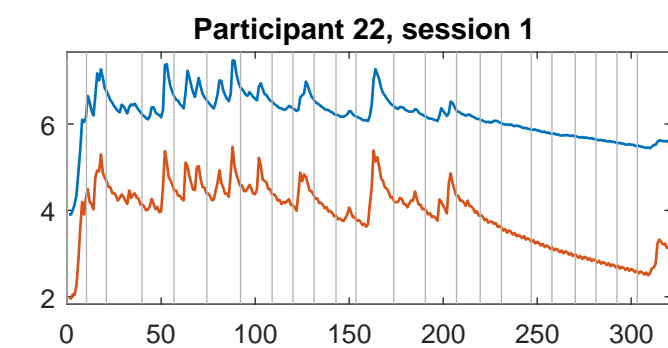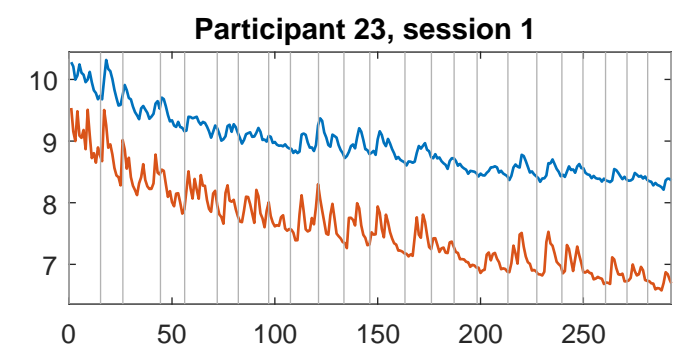

Supplement: supp [file elife-31949-supp-v1.zip]

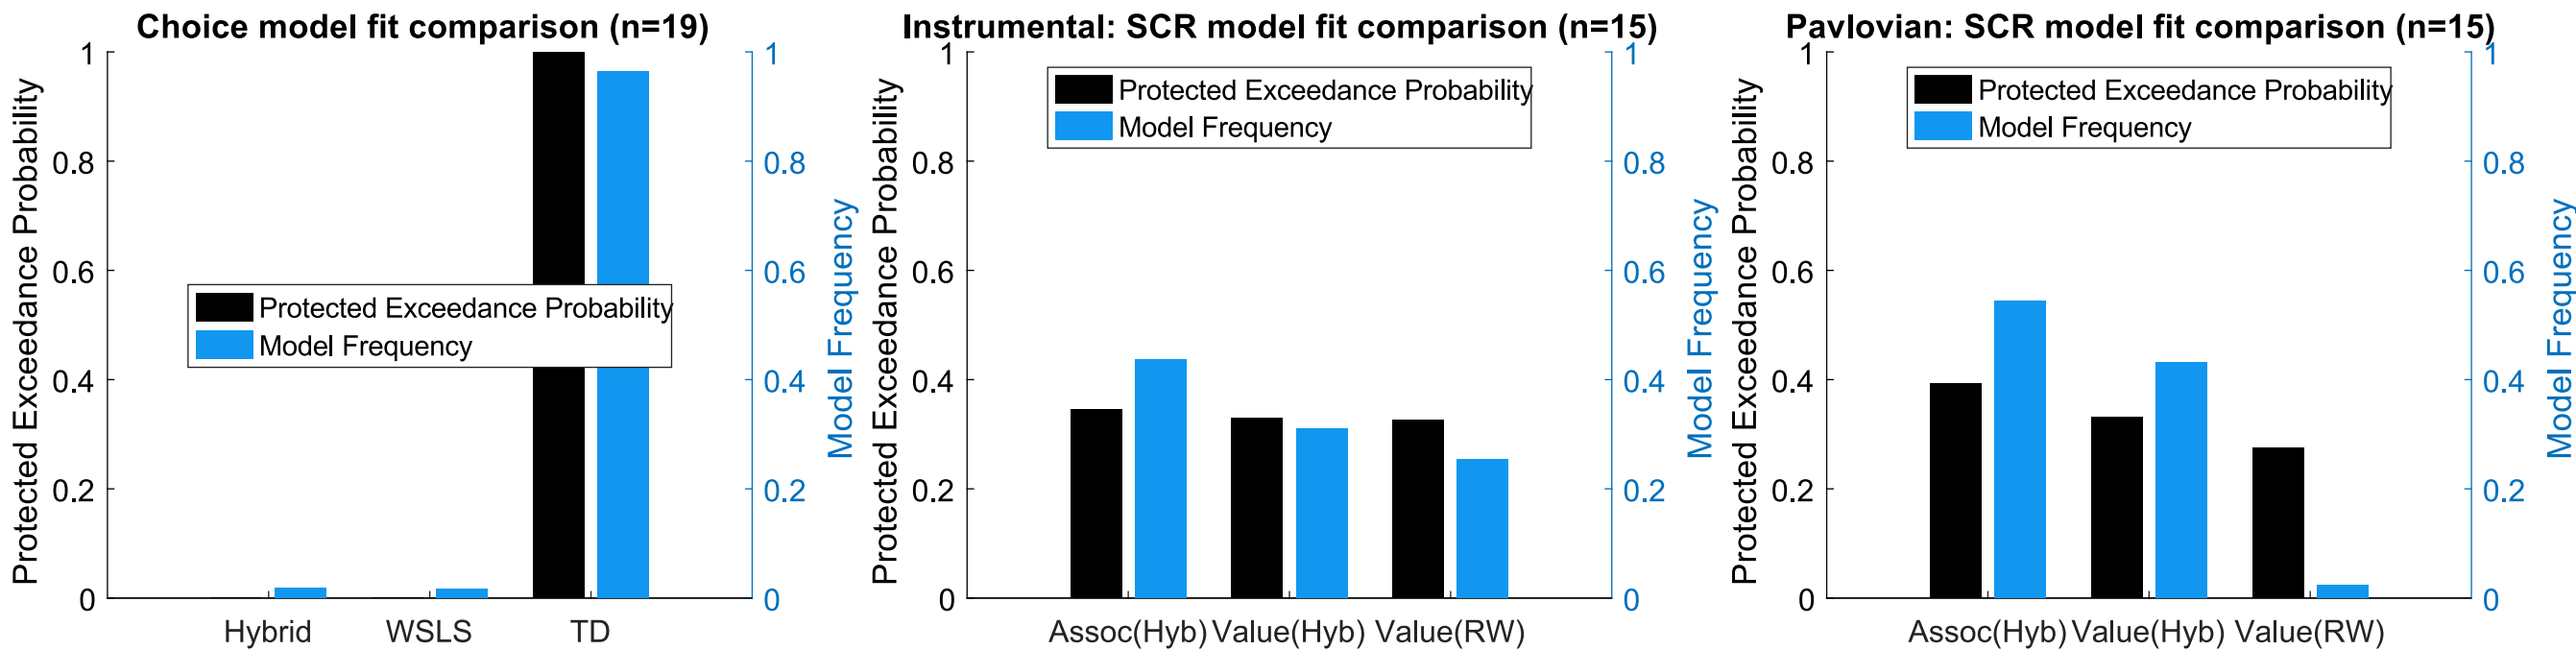

Supplement: supp [file elife-31949-supp-v1.zip]

# Averaged across trials (shaded SEM, n=15)

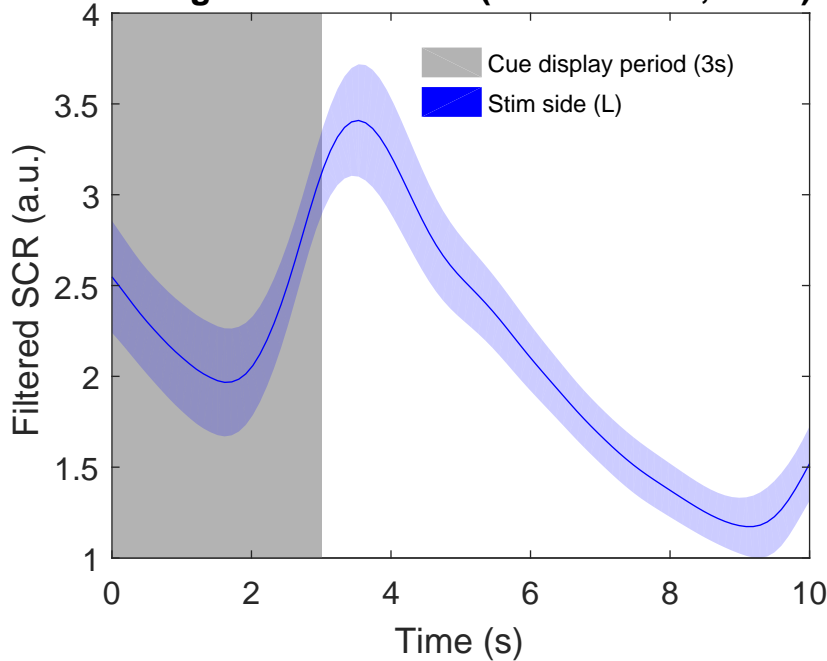

Supplement: supp [file elife-31949-supp-v1.zip]

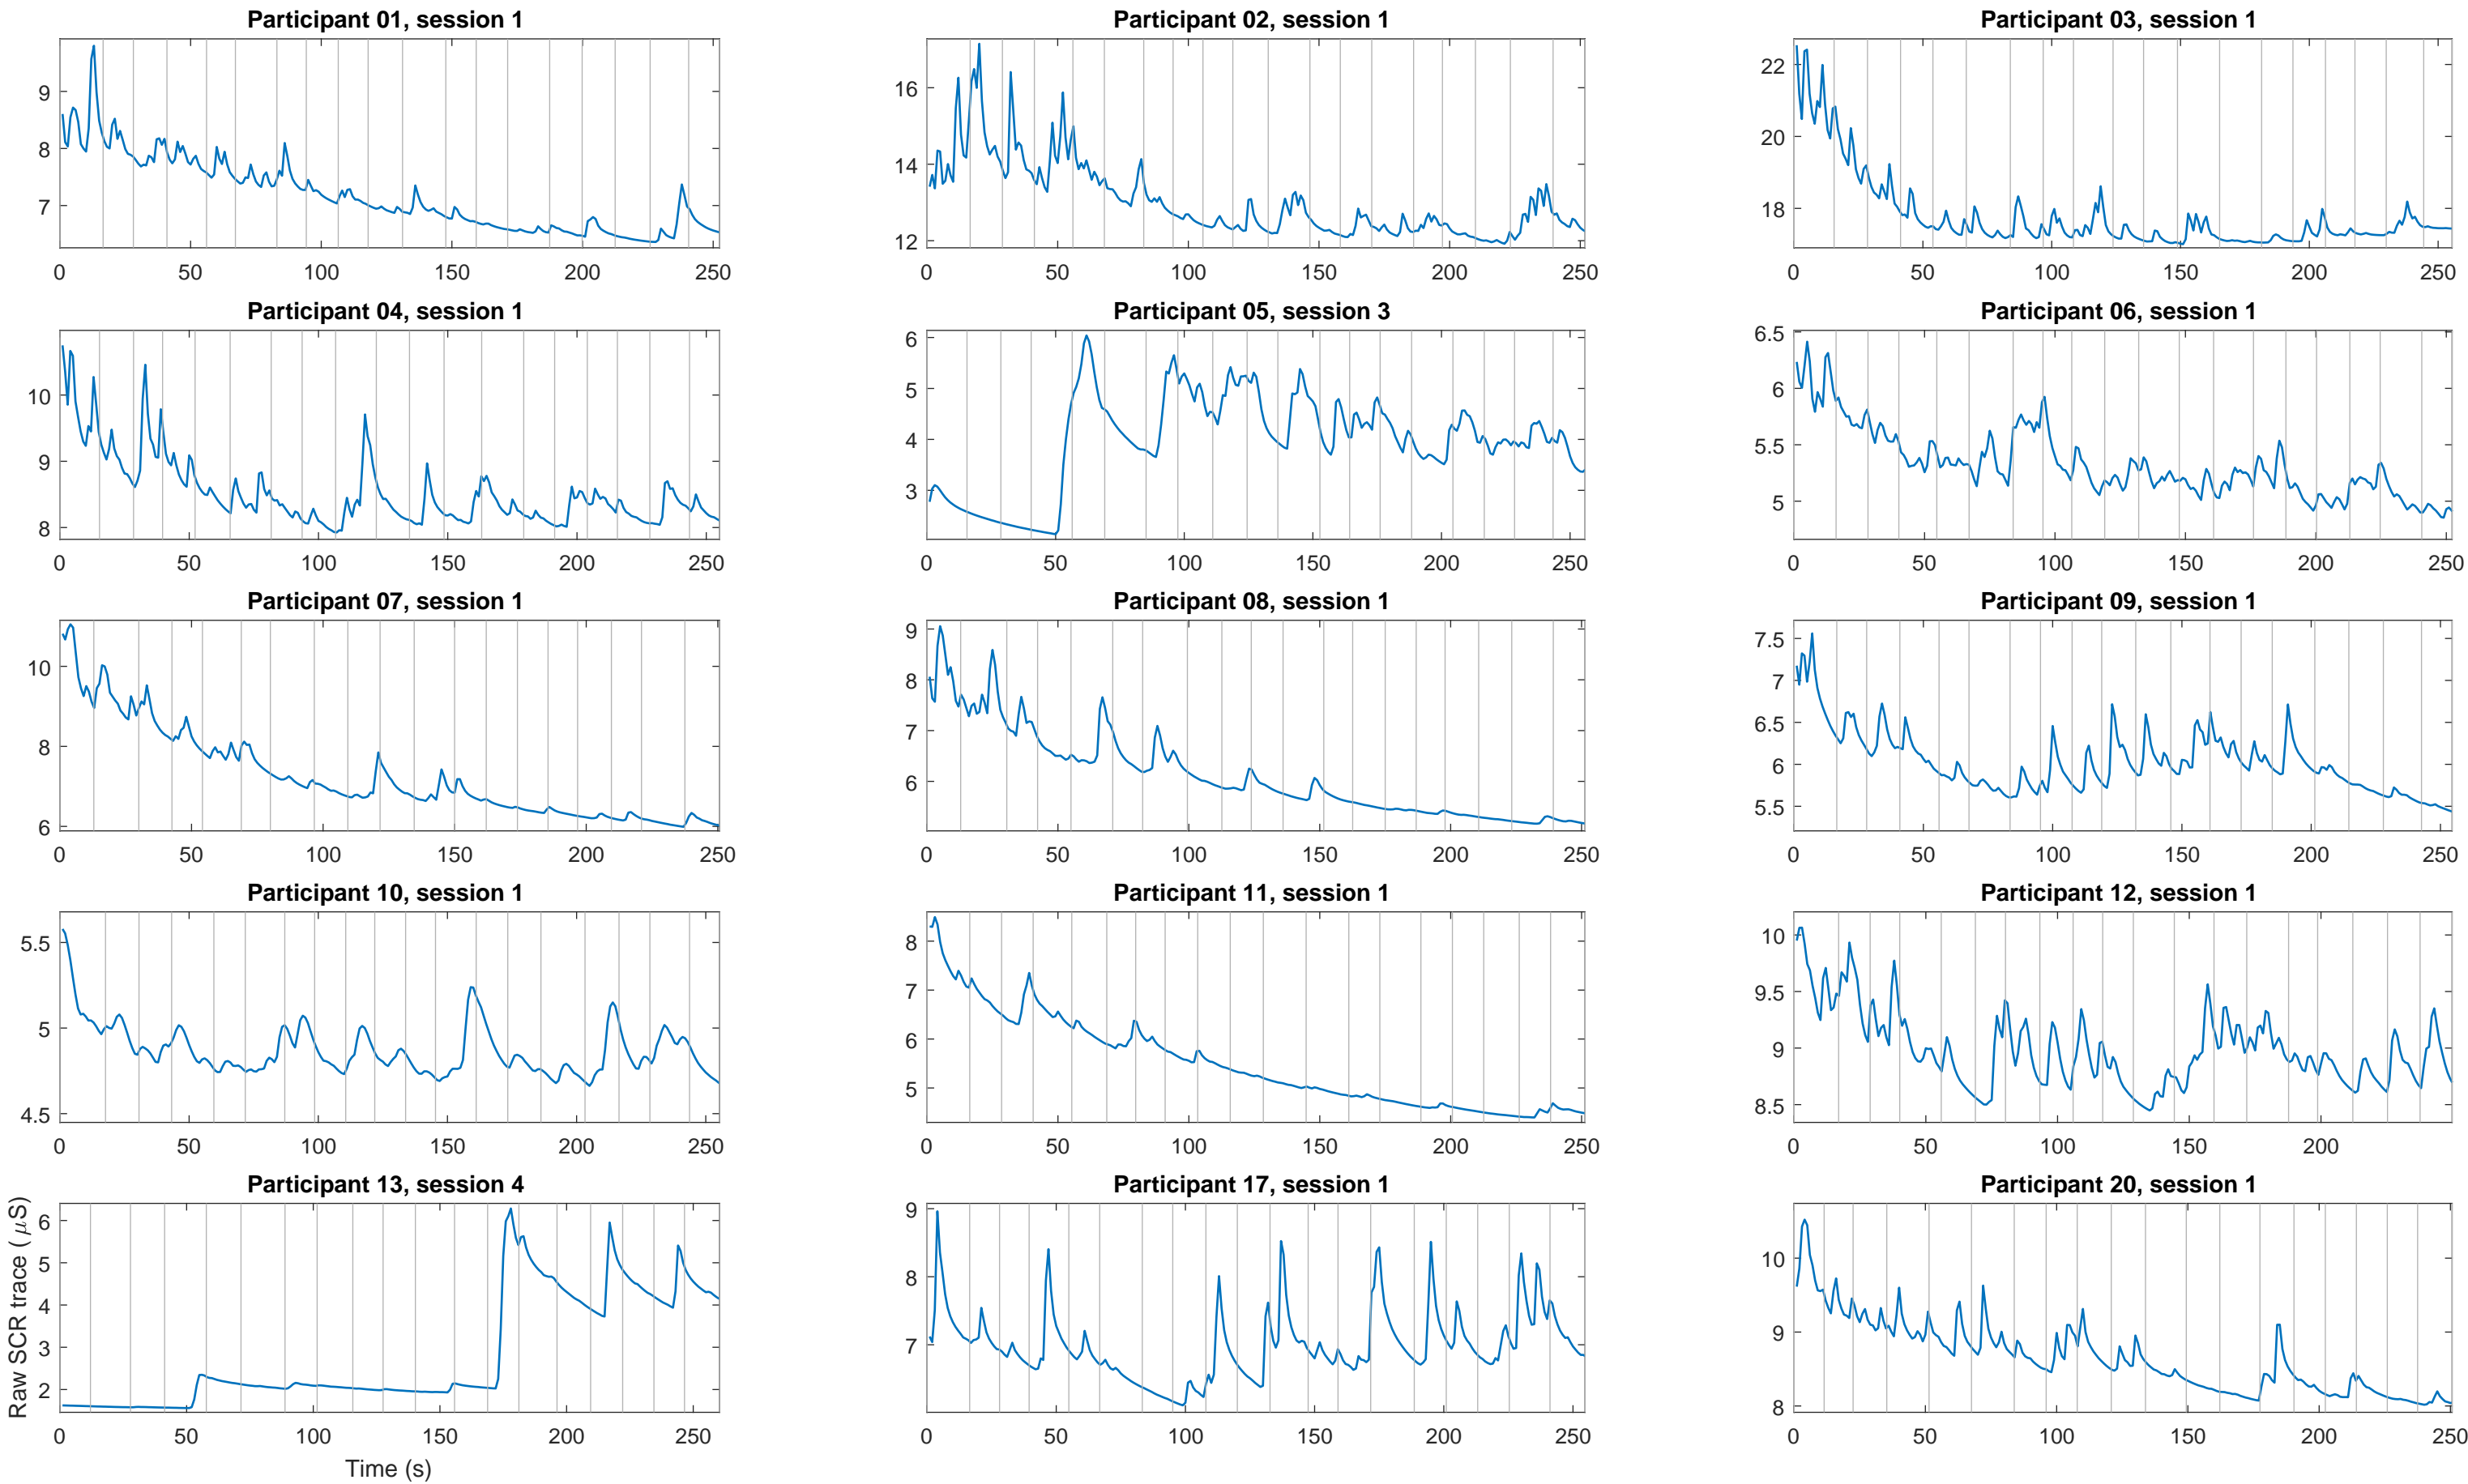

Supplement: supp [file elife-31949-supp-v1.zip]

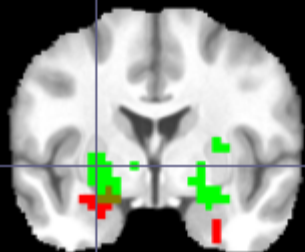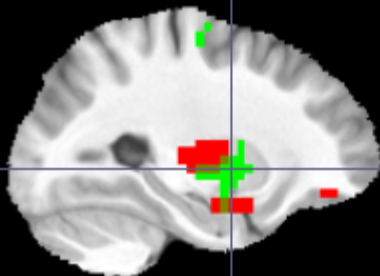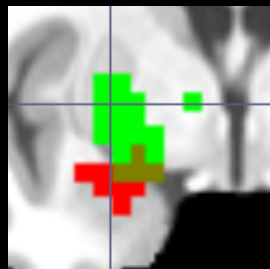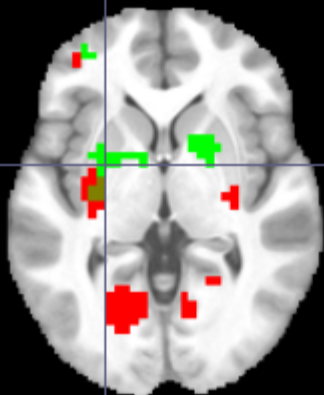

Experiment 1

Experiment 2

Experiment 1&2

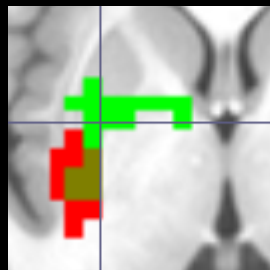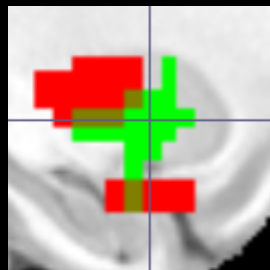

Supplement: supp [file elife-31949-supp-v1.zip]

# Averaged across trials (shaded SEM, n=20)

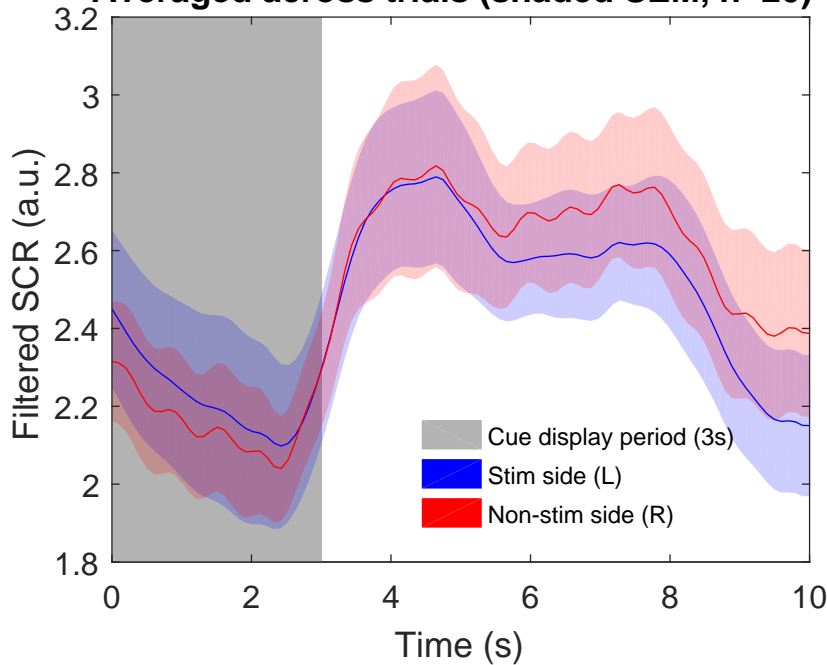

Supplement: supp [file elife-31949-supp-v1.zip › elife_poa_e31949_Figure_4_figure_supplement_2.pdf]
